# Supplementary material
Source: Elsevier journal article supplement (https://www.sciencedirect.com/science/article/pii/S0300893216307527)
Supplement: mmc1 [file mmc1.pdf]

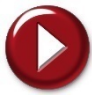

**Supplementary material**

---

**Severe Cardiac Complications of *Shabu* Use: An Emerging Drug  
in Europe**

**Complicaciones cardíacas graves por *shabu*: una droga emergente  
en Europa**

---

**Table 1 of the Supplementary Material**

Serum Levels of Troponin I

| Patient | Necrosis biomarker (troponin I) (normal, < 0.05 ng/mL) |
|---------|--------------------------------------------------------|
| 1       | Positive (peak, 15.147 ng/mL)                          |
| 2       | Positive (peak, 17.415 ng/mL)                          |
| 3       | Positive (peak, 0.540 ng/mL)                           |
| 4       | Positive (peak, 0.275 ng/mL)                           |
| 5       | Positive (peak, 27.131 ng/mL)                          |

**Table 2 of the Supplementary Material**

QTc Characteristics

| Patient | QTc at hospital admission | QTc at discharge/follow-up ECG |
|---------|---------------------------|--------------------------------|
| 1       | 487 ms                    | 424 ms                         |
| 2       | 470 ms                    | 438 ms                         |
| 3       | 464 ms                    | 400 ms                         |
| 4       | Ventricular fibrillation  | -                              |
| 5       | 450 ms                    | 424 ms                         |

QT intervals were corrected by Bazett formula.

ECG, electrocardiogram; QTc: corrected QT.
